# Supplementary material for: Study on the Potential Mechanism of Semen Strychni against Myasthenia Gravis Based on Network Pharmacology and Molecular Docking with Experimental Verification
Source: Evid Based Complement Alternat Med. 2022 Oct 1;2022:3056802. doi: 10.1155/2022/3056802 (PMC9547686; doi:10.1155/2022/3056802)
Supplement: Supplementary Materials — Supplementary Figures 1 and 2: molecular docking diagram of remaining active compounds and core targets. [file 3056802.f1.zip]

Archive with 2 entries (2 files):
- supplement figure 1.pdf
- supplement figure 2.pdf
